# Supplementary material for: Quality risk management for microbial control in membrane-based water for injection production using fuzzy-failure mode and effects analysis
Source: PeerJ Comput Sci. 2024 Dec 23;10:e2565. doi: 10.7717/peerj-cs.2565 (PMC11784823; doi:10.7717/peerj-cs.2565)
Supplement: Supplemental Information 2 [file peerj-cs-10-2565-s002.xlsx]

## Sheet: Sheet1
Code	Expert 1			Expert 2			Expert 3
	O	S	D	O	S	D	O	S	D
FM1	7	2	1	3	3	4	4	6	3
FM2	5	4	1	1	2	3	5	7	4
FM3	6	5	1	3	5	3	5	7	4
FM4	5	4	2	2	2	3	3	6	4
FM5	5	3	2	2	1	3	4	5	4
FM6	2	5	1	2	1	3	4	6	4
FM7	4	6	3	4	5	4	3	7	5
FM8	4	6	3	4	5	4	3	8	5
FM9	9	8	3	7	5	4	8	7	5
FM10	2	9	2	7	5	4	5	6	4
FM11	2	9	3	4	5	7	4	7	5
FM12	2	10	3	4	10	5	3	8	6
FM13	2	10	3	4	10	5	3	8	6
FM14	3	10	3	6	10	5	4	7	6
FM15	2	9	7	4	10	3	3	7	4
FM16	2	9	7	3	10	3	4	6	4
FM17	2	5	2	2	7	4	3	7	5
FM18	2	5	2	2	5	3	4	6	4
FM19	5	10	2	2	8	2	3	7	5
FM20	5	10	1	1	9	3	2	8	6
FM21	5	10	2	3	10	2	3	9	5
FM22	3	5	2	1	5	2	2	7	4
FM23	5	10	2	3	5	2	2	7	4
FM24	5	10	2	3	5	2	2	7	4
